# Supplementary material for: Proteomic Analyses Discern the Developmental Inclusion of Albumin in Pig Enamel: A New Model for Human Enamel Hypomineralization
Source: MDPI journal article supplement (doi:10.3390/ijms242115577), 2023-10-25
Supplement: s1 [file s1]

PeptideCutter

You have selected the protein FETA\_PIG (Q8MJ76) from UniProtKB/Swiss-Prot :

Alpha-fetoprotein precursor (Alpha-1-fetoprotein) (Alpha-fetoglobulin)

The sequence to investigate:

102030405060

MKWVVSIFLI VLLNFTESRT MHENAYGIAS ILDSSQCSAE MNLVDLATIF FAQFVQEATY

708090100110120

KEVNQMVKDV LTVIEKSTGS EQPAGCLENQ VSVFLEEICH EEEIPEKYGL SHCCSQSGEE

130140150160170180

RHNCFLARKK AAPASIPPFQ VPEPVTSCKA YEENRELFMT RYIYEIARRH PFLYAPTILS

190200210220230240

LAAQYDKIIP PCCKAENAVE CFQTKAASIT KELRESSLLN QHMCTVMRQF GARTFRAITV

250260270280290300

TKLSQKFPKA NFTEIQKLVL DVAHIHEECC RGNVLECLQD AERVVSYVCS QQDTLSSKIA

310320330340350360

ECCKLPTTLE LGQCIHAEN DDKPEGLSPN LNRFLGERDF NQLSSREKDL SMARFTYEYS

370380390400410420

RRHPKLAVPV ILRVAKGYQE LLEKCSQSEN PLECQDKGEE ELEKYIQESQ ALAKRSCGLF

430440450460470480

QKLGEYYLQN AFLVAYTKKA PQLTPPELMA LTRKMATTGA ACCHLSEDRQ LACGEGAADL

490500510520530540

IIGQLCIRHE EMPINPGVGQ CCTSSYANRR PCFSSLVLDE TYVPPPFSDS KFIHKDLCQ

550560570580590600

AQGVALQTMK QQFLINLVKQ KPQITEEQLE AVIADFSGLL EKCCQGQEQE VCFAEEGPAL

610

ISKTRASLGV

The sequence is 610 amino acids long.

Available enzymes

The enzyme(s) that you have chosen:

- Trypsin

You have chosen to display all possible cleaving enzymes.

These enzymes cleave the sequence:

| Name of enzyme          | No. of cleavages | Positions of cleavage sites                                                                                                                                                                                                           |
|-------------------------|------------------|---------------------------------------------------------------------------------------------------------------------------------------------------------------------------------------------------------------------------------------|
| <a href="#">Trypsin</a> | 59               | 2 19 61 68 76 107 121 128 129 130 149 155 161 168 187 194 205 211 214 228 233 236 242 246 249 257 271 283 298 304 333 338 346 348 354 361 365 373 376 384 397 404 414 415 422 438 439 453 454 469 488 509 531 536 550 559 582 603 605 |

These are the cleavage sites of the chosen enzymes and chemicals mapped onto the entered protein sequence:

- You have chosen a block size of 60 for the map.
- Please note that the cleavage occurs at the **right side** (C-terminal direction) of the marked amino acid.
- You have the possibility to display the results of a single enzyme by **mouseclicking** on the respective enzyme name in the map.

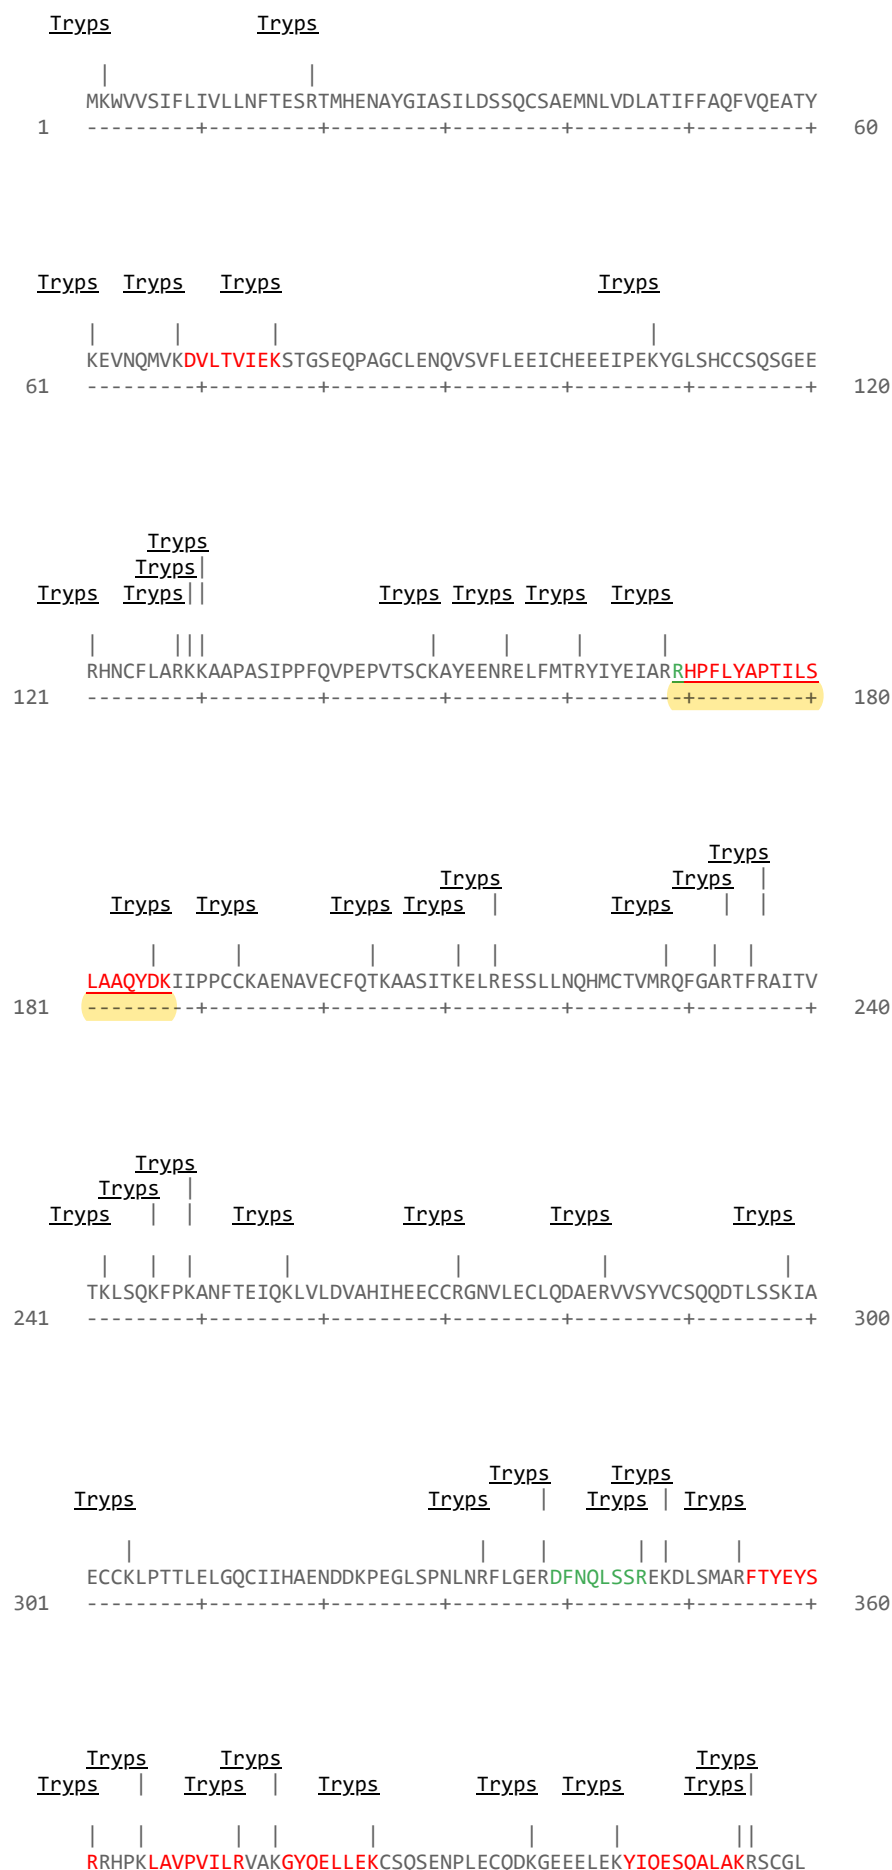

361 -----+-----+-----+-----+-----+-----+-----+ 420

Tryps Tryps Tryps Tryps  
 | | | |  
 QK LGEYYLQNAFLVAYTK KAPQLTPPELMALTR KMATTGAACCHLSEDRQLACGEGAADL  
 421 -----+-----+-----+-----+-----+-----+-----+ 480

Tryps Tryps Tryps Tryps  
 | | | |  
 IIGQLCIRHEEMPINPGVGQCCTSSYANRRPCFSSLVLDETYVPPFSDDKFIFHKDLCQ  
 481 -----+-----+-----+-----+-----+-----+-----+ 540

Tryps Tryps Tryps  
 | | |  
 AQGVALQTMK QQFLINLVK QKPQITEEQLEAVIADFSGLLEK CCQGQEQEVCFAEEGPAL  
 541 -----+-----+-----+-----+-----+-----+-----+ 600

Tryps  
 Tryps |  
 | |  
 ISKTRASLGV  
 601 -----+ 610

\*Peptides Identified in Enamel from 4-Week-Old Pig

\*Peptides Identified in Enamel from 8-Week-Old Pig

\*Peptides Identified in Enamel from 4 & 8-Week-Old Pigs

\*Peptides Identified in Serum from 4-Week-Old Pig

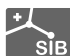

Expasy is operated by the [SIB Swiss Institute of Bioinformatics](#) | [Terms of Use](#)

[Back to the top](#)
